# Supplementary material for: Tenovin-1 Ameliorates Renal Fibrosis in High-Fat-Diet-Induced Diabetic Nephropathy via Antioxidant and Anti-Inflammatory Pathways
Source: MDPI journal article supplement (doi:10.3390/antiox11091812), 2022-09-14
Supplement: s1 [file s1]

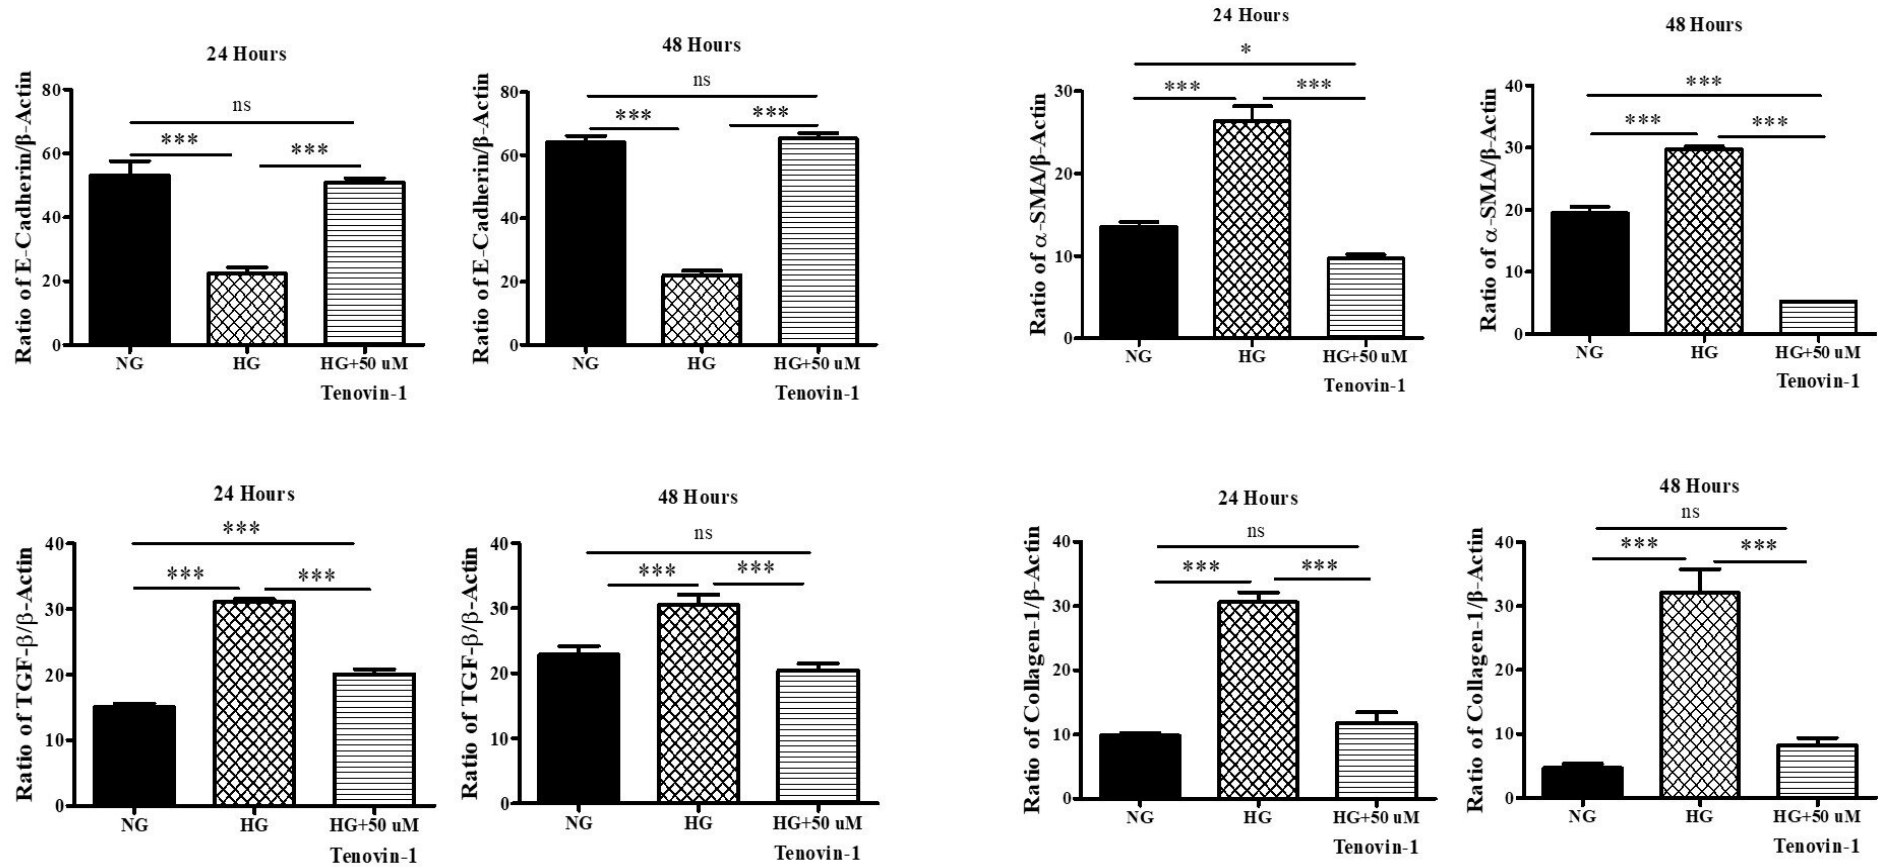

**Figure S1. Band intensities of ECM proteins from in-vitro analysis of NRK-52E cells:** Band intensities of ECM proteins from in-vitro analysis of NRK-52E cells were quantified by densitometric analysis and have been presented as relative ratio of three repetitive analyses.  $\beta$ -actin was used as the loading control. Statistical analysis was performed using one-way ANOVA followed by Tukey's HSD post-hoc test for multiple comparisons (\*\* $p < 0.001$ , \* $p < 0.05$ ). NG, normal glucose; HG, high-glucose.

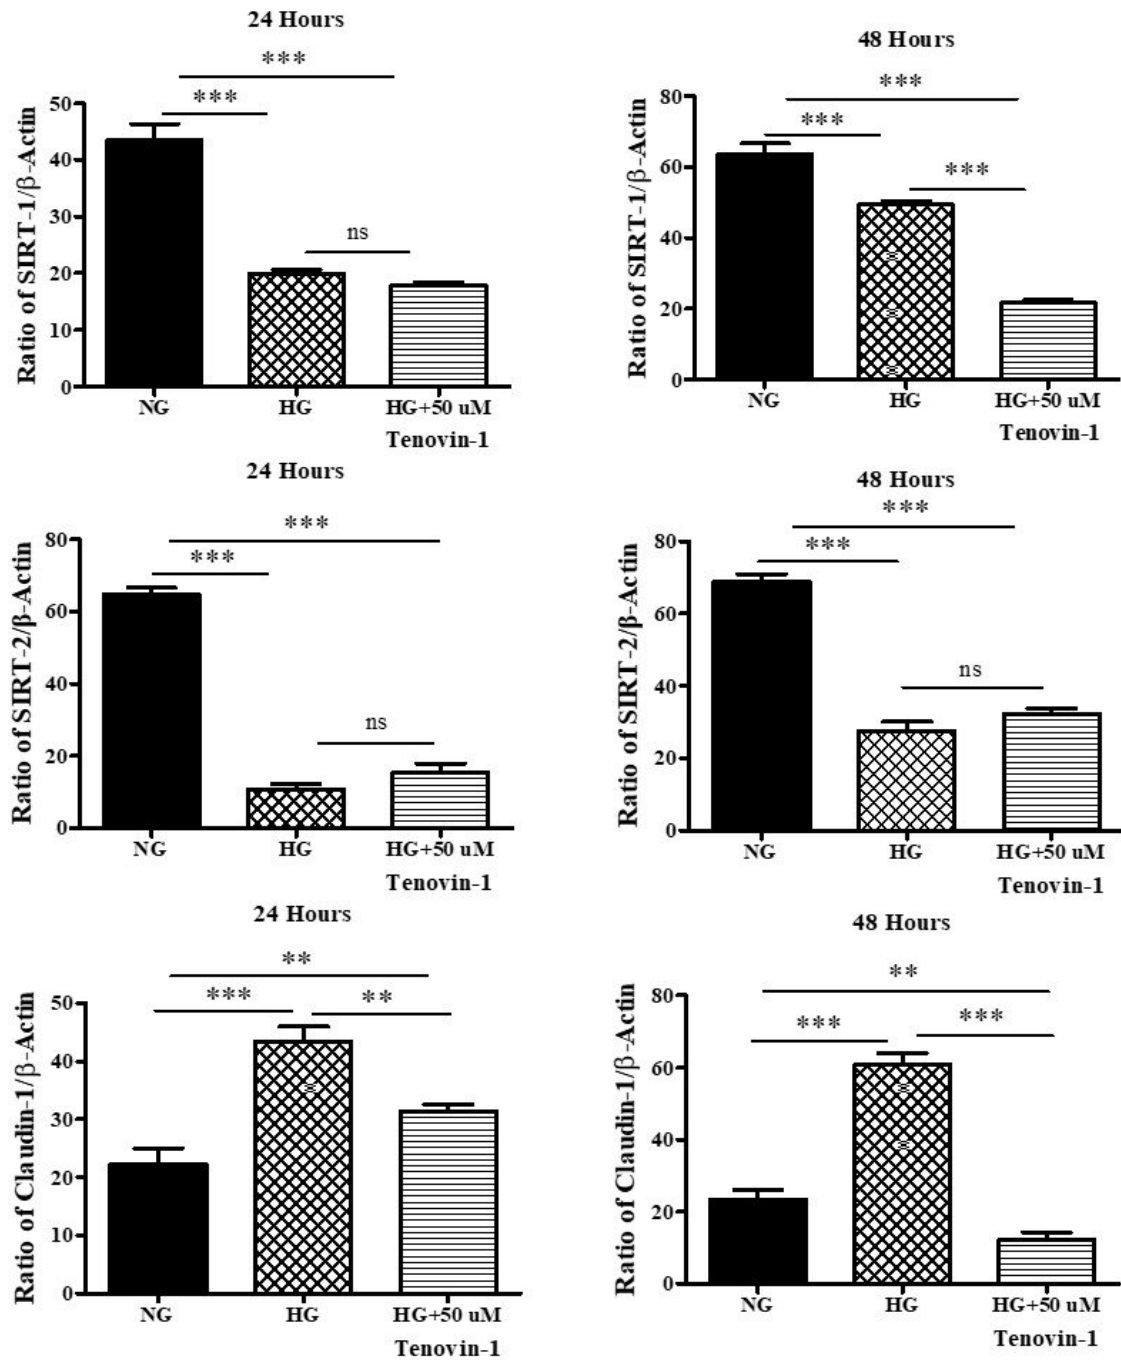

**Figure S2. Band intensities of SIRTs and claudin-1 from in-vitro analysis:** Band intensities of SIRTs and claudin-1 from in-vitro analysis of NRK-52E cell lysates were quantified by densitometric analysis and have been presented as relative ratio of three repetitive analyses.  $\beta$ -actin was used as the loading control. Statistical analysis was performed using one-way ANOVA followed by Tukey's HSD post-hoc test for multiple comparisons (\*\* $p < 0.01$ , \*\*\* $p < 0.001$ ). NG, normal glucose; HG, high-glucose.
